# Supplementary material for: Human organotypic brain slice culture: a novel framework for environmental research in neuro-oncology
Source: Life Sci Alliance. 2019 Jun 27;2(4):e201900305. doi: 10.26508/lsa.201900305 (PMC6599970; doi:10.26508/lsa.201900305)
Supplement: Supplementary file 1 [file LSA-2019-00305_TableS1.xlsx]

## Sheet: Final Version
Patient #	Patient	Sex	Age (in yrs)	Region of origin	Classification	Diagnosis	Time between Diagnosis and Surgery in (days/years)
1	1	m	62	temporal	Tumor	Gliosarcoma	3 (d)
2	2	m	68	frontal	Tumor	Glioblastoma multiforme, WHO-Grad IV, IDH-Wildtyp	1(d)
3	3	f	71	temporal	Tumor	Glioblastoma multiforme, WHO-Grad IV, IDH-Wildtyp, positive mgmt promoter methylation	6(d)
4	4	m	54	frontal	Tumor	Meningeoma, WHO-Grad I	3(d)
5	5	m	58	parietal	Tumor	Glioblastoma multiforme, WHO-Grad IV, IDH-Wildtyp	7(d)
6	6	f	82	temporal	Tumor	Glioblastoma multiforme, WHO-Grad IV, IDH-Wildtyp	5(d)
7	7	m	61	parietal	Tumor	Glioblastoma multiforme, WHO-Grad IV, IDH-Wildtyp	recurrance
8	8	m	58	temporal	Tumor	Glioblastoma multiforme, WHO-Grad IV, IDH-Wildtyp	2(d)
9	9	f	34	frontal	Epileptic	Structural epilepsy	3(y)
10	10	f	75	temporal	Tumor	Glioblastoma multiforme, WHO-Grad IV, IDH-Wildtyp, positive mgmt promoter methylation	3(d)
11	11	f	39	temporal	Tumor	Reaktiv gliotisch verändertes ZNS-Gewebe mit Residuen älterer Einblutungen ohne definitiven Tumornachweis	5(y)
12	12	m	76	temporal	Tumor	Glioblastoma multiforme, WHO-Grad IV, IDH-Wildtyp	3(d)
13	13	m	58	occipital	Tumor	Glioblastoma multiforme, WHO-Grad IV, IDH-mutated	11(y)
14	14	f	2	occipital	Epileptic	Therapy refractory epilepsy	58(d)
15	15	m	59	frontal	Tumor	Oligodendroglioma, WHO-Grad II, IDH-mutated	22(y)
16	16	m	84	temporal	Tumor	Glioblastoma multiforme, WHO-Grad IV, IDH-Wildtyp, positive mgmt promoter methylation	1(d)
17	17	m	45	frontal	Tumor	anaplastic astrocytoma, WHO-Grad III, IDH-mutated,	50(d)
18	18	f	44	temporal	Epileptic	Therapy refractory epilepsy	1(y)
19	19	m	77	temporal	Tumor	Glioblastoma multiforme, WHO-Grad IV, IDH-Wildtyp	4(d)
20	20	m	54	frontal	Tumor	Glioblastoma multiforme, WHO-Grad IV, IDH-Wildtyp,	1(d)
21	21	m	55	temporal	Tumor	Glioblastoma multiforme, WHO-Grad IV, IDH-Wildtyp.	recurrance
22	22	m	39	temporal	Epileptic	Therapy refractory epilepsy
23	23	m	66	temporal	Tumor	Glioblastoma multiforme, WHO-Grad IV, IDH-Wildtyp	2(d)
24	24	f	1	temporal	Epileptic	Therapy refractory epilepsy	90(d)
25	25	m	50	frontal	Tumor	Anaplastic oligodendroglioma, WHO-Grade III, IDH-mutated, 1p/19q-codeletion	4(y)
26	26	m	79	frontal	Tumor	Glioblastoma multiforme, WHO-Grade IV, IDH-Wildtyp,	2(d)
